# Supplementary material for: Electronic coupling in the excited electronic state of stacked DNA base homodimers
Source: Royal Society of Chemistry journal article supplement (doi:10.1039/b618382d), 2007-01-01
Supplement: b618382d.pdf [file b618382d.pdf]

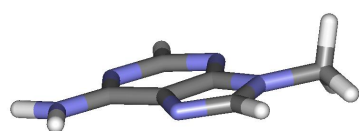

(a)

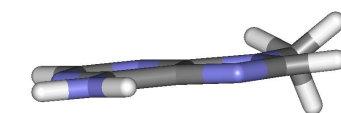

(b)

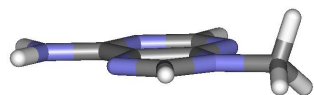

(c)

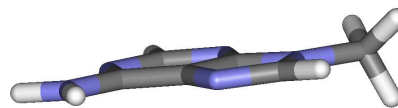

(d)

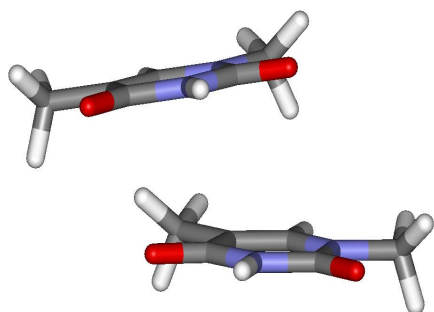

(e)

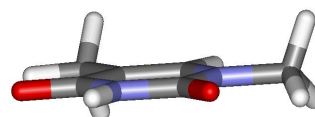

(f)

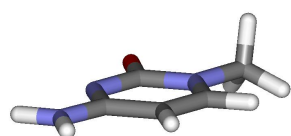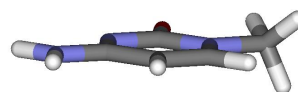

Fig.1 Side view of stacked DNA bases: A-A in A-DNA (a) and in B-DNA (b), T-T in A-DNA (c) and B-DNA (d), C-C in A-DNA (e) and B-DNA (f) conformation. C, O, N, and H atoms are in grey, red, blue, and white colors, respectively.

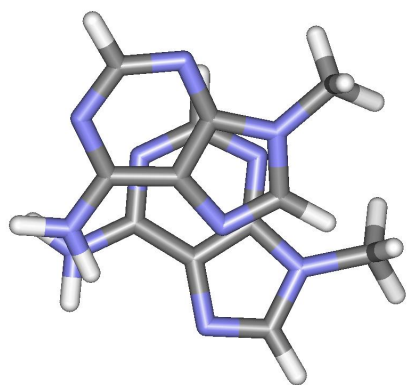

(a)

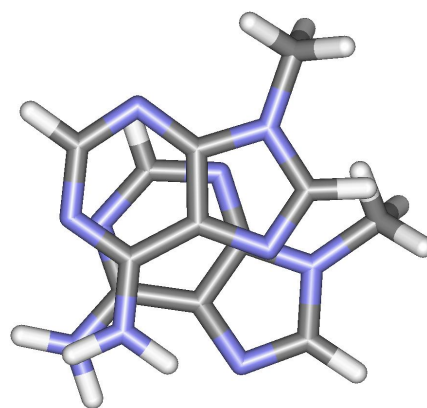

(b)

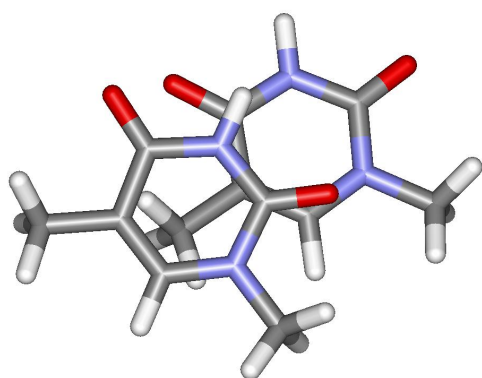

(c)

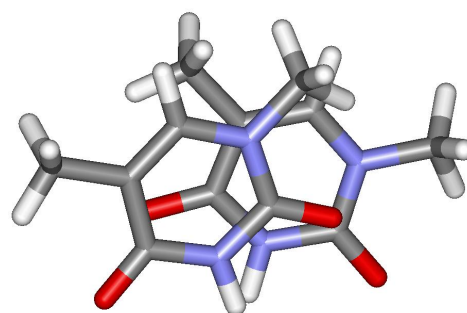

(d)

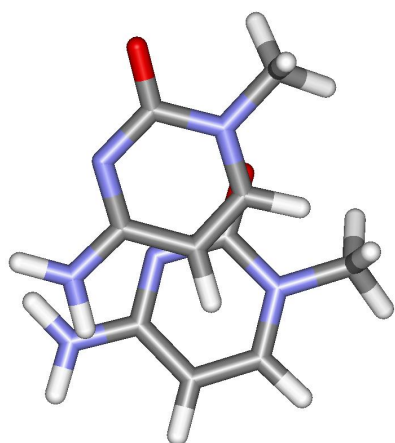

(e)

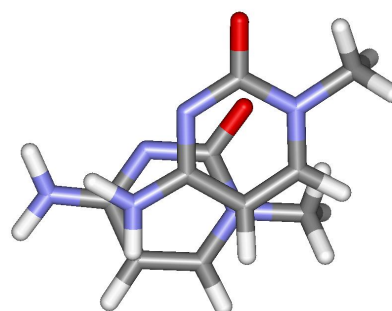

(f)

Fig.2 Top view of stacked DNA bases: A-A in A-DNA (a) and in B-DNA (b), T-T in A-DNA (c) and B-DNA (d), C-C in A-DNA (e) and B-DNA (f) conformation. C, O, N, and H atoms are in grey, red, blue, and white colors, respectively.

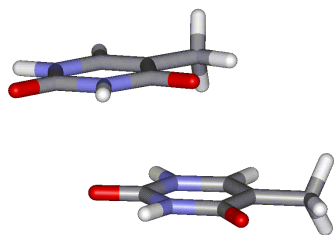

(a)

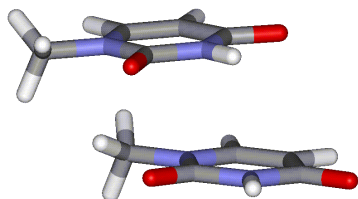

(b)

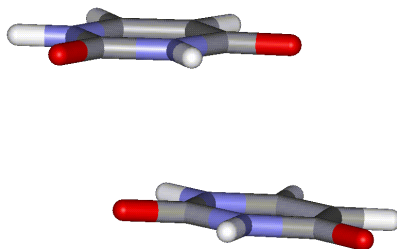

(c)

Fig.3 Structures of non-methylated T (a) methylated uracil (b), and non-methylated uracil (c) in B-DNA conformations. C, O, N, and H atoms are in grey, red, blue, and white colors, respectively.

Table S1. Excitation energies (in eV) and their splitting ( $\Delta E$ ) of model ethylene-dimer system in stacked conformation<sup>a</sup>

|                                  | SAC-CI <sup>b</sup> |               |                      |               |
|----------------------------------|---------------------|---------------|----------------------|---------------|
|                                  | cc-pVDZ             | aug-cc-pVDZ   | cc-pVTZ              | aug-cc-pVTZ   |
| $1^1B_2 (\pi \rightarrow \pi^*)$ | 8.547 (8.608)       | 7.466 (7.520) | 8.042                | 7.264 (7.334) |
| $2^1B_2 (\pi \rightarrow \pi^*)$ | 8.937 (8.988)       | 7.747 (7.808) | 8.470                | 7.556 (7.604) |
| $\Delta E$                       | 0.390 (0.380)       | 0.281 (0.288) | 0.428                | 0.292 (0.270) |
|                                  | RI-CC2              |               |                      |               |
|                                  | cc-pVDZ             | aug-cc-pVDZ   | cc-pVTZ              | aug-cc-pVTZ   |
| $1^1B_2 (\pi \rightarrow \pi^*)$ | 8.515               | 7.748         | 8.074                | 7.547         |
| $2^1B_2 (\pi \rightarrow \pi^*)$ | 8.911               | 7.773         | 8.516                | 7.815         |
| $\Delta E$                       | 0.396               | 0.245         | 0.442                | 0.267         |
|                                  | CASPT2 <sup>c</sup> |               | MR-AQCC <sup>d</sup> |               |
|                                  | cc-pVDZ             | cc-pVTZ       | cc-pVTZ              |               |
| $1^1B_2 (\pi \rightarrow \pi^*)$ | 8.152(8.103)        | 7.729(7.782)  | 8.275                |               |
| $2^1B_2 (\pi \rightarrow \pi^*)$ | 8.488(8.455)        | 8.142(8.167)  | 8.699                |               |
| $\Delta E$                       | 0.336(0.341)        | 0.413(0.384)  | 0.424                |               |

<sup>a</sup>  $C_{2v}$  symmetry was used. Molecules were oriented in stacked conformation at the distance 3.4 Å. <sup>b</sup> Calculations with singles and doubles linked excitation operators. Calculations which include excitation operators through sextuples are given in parantheses. <sup>c</sup> Results obtained with the active space which includes 12 electrons (orbitals of  $a_1$  and  $b_2$  symmetry) and  $\pi^*$  ( $b_2$  symmetry) virtual orbitals The results of calculations with 4 electrons in  $\pi$  orbitals ( $a_1$  symmetry) in active space are given in parantheses. Inner shell orbitals were kept frozen. <sup>d</sup> The same active space as used for CASPT2 calculations.

Compared to energy splitting obtained with cc-pVD(T)Z basis set, those obtained with augmented basis sets are systematically underestimated. The corresponding states have significant contribution of Rydberg-type states

Table S2. Excitation energies (in eV) and their splitting ( $\Delta E$ ) of model ethylene-acetylene system in stacked conformation<sup>a</sup>

|                                 | SAC-CI <sup>b</sup><br>cc-pVDZ | aug-cc-pVDZ  | cc-pVTZ | aug-cc-pVTZ  | RI-CC2<br>cc-pVDZ |
|---------------------------------|--------------------------------|--------------|---------|--------------|-------------------|
| $1^1A_2(\pi \rightarrow \pi^*)$ | 7.450(7.504)                   | 6.892(6.901) | 6.992   | 6.628(6.670) | 7.559             |
| $1^1B_2(\pi \rightarrow \pi^*)$ | 7.740(7.842)                   | 7.023(7.073) | 7.256   | 6.772(6.894) | 7.807             |
| $2^1A_2(\pi \rightarrow \pi^*)$ | 7.830(7.891)                   | 7.192(7.217) | 7.371   | 6.970(7.037) | 7.946             |
| $\Delta E(1A_2, 1B_2)$          | 0.290(0.338)                   | 0.132(0.172) | 0.265   | 0.144(0.224) | 0.248             |
| $\Delta E(2A_2, 1B_2)$          | 0.090(0.048)                   | 0.169(0.144) | 0.115   | 0.144(0.143) | 0.139             |

  

|                                 | MR-AQCC <sup>c</sup><br>cc-pVDZ | cc-pVTZ |
|---------------------------------|---------------------------------|---------|
| $1^1A_2(\pi \rightarrow \pi^*)$ | 7.440                           | 7.249   |
| $1^1B_2(\pi \rightarrow \pi^*)$ | 7.785                           | 7.578   |
| $2^1A_2(\pi \rightarrow \pi^*)$ | 7.853                           |         |
| $\Delta E(1A_2, 1B_2)$          | 0.345                           | 0.329   |
| $\Delta E(2A_2, 1B_2)$          | 0.070                           |         |

<sup>a</sup> $C_{2v}$  symmetry was used. Molecules were oriented in stack conformation at the distance 3.4 Å.

<sup>b</sup>Calculations with singles and doubles linked excitation operators. Calculations which include excitation operators through sextuples are given in parentheses. <sup>c</sup>Active space includes occupied  $\pi$  ( $a_1$  and  $b_1$  symmetry) and virtual  $\pi^*$  ( $b_2$  and  $a_2$  symmetry) orbitals. Inner shell orbitals were kept frozen.

Different values of calculated energy splittings using cc-pVD(T)Z basis sets and corresponding augmented basis set result from significant contribution of Rydberg type character in the excited states of the latter.

A-A (A-DNA)

|   |          |           |           |
|---|----------|-----------|-----------|
| C | 6.958000 | -5.037000 | 2.040000  |
| N | 3.084000 | -0.815000 | 0.130000  |
| C | 4.301000 | -1.290000 | 0.430000  |
| C | 4.530000 | -2.594000 | 0.910000  |
| N | 3.676000 | -3.650000 | 1.190000  |
| C | 4.470000 | -4.580000 | 1.610000  |
| N | 5.785000 | -4.219000 | 1.620000  |
| C | 5.825000 | -2.930000 | 1.170000  |
| N | 6.922000 | -2.156000 | 1.020000  |
| C | 6.579000 | -0.971000 | 0.560000  |
| N | 5.377000 | -0.499000 | 0.260000  |
| H | 6.679000 | -6.088000 | 1.967000  |
| H | 7.204000 | -4.770000 | 3.068000  |
| H | 7.786000 | -4.808000 | 1.370000  |
| H | 2.979000 | 0.149000  | -0.218000 |
| H | 2.254000 | -1.414000 | 0.247000  |
| H | 4.120000 | -5.563000 | 1.927000  |
| H | 7.404000 | -0.276000 | 0.403000  |
| C | 8.576000 | -0.480000 | 4.600000  |
| N | 3.036000 | 0.980000  | 2.690000  |
| C | 4.316000 | 1.238000  | 2.990000  |
| C | 5.213000 | 0.264000  | 3.470000  |
| N | 5.065000 | -1.086000 | 3.750000  |
| C | 6.236000 | -1.439000 | 4.170000  |
| N | 7.147000 | -0.425000 | 4.180000  |
| C | 6.485000 | 0.681000  | 3.730000  |
| N | 6.990000 | 1.925000  | 3.580000  |
| C | 6.061000 | 2.737000  | 3.120000  |
| N | 4.794000 | 2.485000  | 2.820000  |
| H | 8.910000 | -1.515000 | 4.527000  |
| H | 8.640000 | -0.122000 | 5.628000  |
| H | 9.150000 | 0.161000  | 3.930000  |
| H | 2.426000 | 1.734000  | 2.342000  |
| H | 2.661000 | 0.028000  | 2.807000  |
| H | 6.472000 | -2.455000 | 4.487000  |
| H | 6.380000 | 3.767000  | 2.963000  |

A-A (B-DNA)

|   |           |           |          |
|---|-----------|-----------|----------|
| C | 5.841000  | 0.470000  | 6.290000 |
| N | 4.615000  | -0.371000 | 6.340000 |
| C | 4.519000  | -1.735000 | 6.260000 |
| N | 3.298000  | -2.174000 | 6.330000 |
| C | 2.540000  | -1.026000 | 6.480000 |
| C | 1.152000  | -0.813000 | 6.610000 |
| N | 0.255000  | -1.812000 | 6.620000 |
| N | 0.730000  | 0.454000  | 6.730000 |
| C | 1.628000  | 1.435000  | 6.720000 |
| N | 2.936000  | 1.369000  | 6.600000 |
| C | 3.329000  | 0.087000  | 6.480000 |
| H | 5.526000  | 1.392000  | 6.779000 |
| H | 6.673000  | 0.008000  | 6.821000 |
| H | 6.164000  | 0.659000  | 5.266000 |
| H | 5.410000  | -2.343000 | 6.198000 |
| H | -0.728000 | -1.603000 | 6.720000 |
| H | 0.565000  | -2.773000 | 6.530000 |
| H | 1.303000  | 2.460000  | 6.821000 |
| C | 4.449000  | 3.814000  | 9.670000 |

|   |           |           |           |
|---|-----------|-----------|-----------|
| N | 3.952000  | 2.412000  | 9.720000  |
| C | 4.675000  | 1.253000  | 9.640000  |
| N | 3.946000  | 0.179000  | 9.710000  |
| C | 2.659000  | 0.663000  | 9.860000  |
| C | 1.410000  | 0.020000  | 9.990000  |
| N | 1.271000  | -1.316000 | 10.000000 |
| N | 0.324000  | 0.797000  | 10.110000 |
| C | 0.473000  | 2.118000  | 10.100000 |
| N | 1.571000  | 2.834000  | 9.980000  |
| C | 2.642000  | 2.027000  | 9.860000  |
| H | 3.652000  | 4.374000  | 10.159000 |
| H | 5.394000  | 3.930000  | 10.201000 |
| H | 4.599000  | 4.157000  | 8.646000  |
| H | 5.753000  | 1.286000  | 9.578000  |
| H | 0.353000  | -1.724000 | 10.100000 |
| H | 2.087000  | -1.912000 | 9.910000  |
| H | -0.392000 | 2.756000  | 10.201000 |

T-T (A-DNA)

|   |           |          |           |
|---|-----------|----------|-----------|
| C | 3.134000  | 7.998000 | 0.520000  |
| O | 1.226000  | 3.064000 | 2.090000  |
| C | 1.598000  | 4.186000 | 1.730000  |
| N | 2.935000  | 4.520000 | 1.740000  |
| C | 3.486000  | 5.733000 | 1.360000  |
| O | 4.686000  | 5.933000 | 1.410000  |
| N | 2.589000  | 6.676000 | 0.940000  |
| C | 1.239000  | 6.432000 | 0.890000  |
| C | 0.738000  | 5.248000 | 1.260000  |
| C | -0.728000 | 4.927000 | 1.230000  |
| H | 2.332000  | 8.732000 | 0.593000  |
| H | 3.485000  | 7.906000 | -0.508000 |
| H | 3.955000  | 8.252000 | 1.190000  |
| H | 3.591000  | 3.795000 | 2.063000  |
| H | 0.565000  | 7.215000 | 0.543000  |
| H | -1.304000 | 5.852000 | 1.226000  |
| H | -0.956000 | 4.354000 | 0.331000  |
| H | -0.990000 | 4.340000 | 2.111000  |
| C | 6.958000  | 5.037000 | -2.040000 |
| O | 2.687000  | 1.916000 | -0.470000 |
| C | 3.606000  | 2.659000 | -0.830000 |
| N | 4.912000  | 2.218000 | -0.820000 |
| C | 6.031000  | 2.941000 | -1.200000 |
| O | 7.148000  | 2.461000 | -1.150000 |
| N | 5.785000  | 4.219000 | -1.620000 |
| C | 4.517000  | 4.743000 | -1.670000 |
| C | 3.456000  | 4.018000 | -1.300000 |
| C | 2.049000  | 4.539000 | -1.330000 |
| H | 6.679000  | 6.088000 | -1.967000 |
| H | 7.204000  | 4.770000 | -3.068000 |
| H | 7.786000  | 4.808000 | -1.370000 |
| H | 5.072000  | 1.253000 | -0.497000 |
| H | 4.373000  | 5.766000 | -2.017000 |
| H | 2.065000  | 5.629000 | -1.334000 |
| H | 1.547000  | 4.180000 | -2.229000 |
| H | 1.512000  | 4.187000 | -0.449000 |

T-T (B-DNA)

|   |           |           |           |
|---|-----------|-----------|-----------|
| C | 4.330000  | 3.887000  | 44.048000 |
| N | 3.833000  | 2.485000  | 44.098000 |
| C | 4.704000  | 1.429000  | 43.998000 |
| C | 4.260000  | 0.157000  | 44.048000 |
| C | 5.167000  | -1.031000 | 43.938000 |
| C | 2.854000  | -0.130000 | 44.198000 |
| O | 2.364000  | -1.264000 | 44.248000 |
| N | 2.057000  | 0.988000  | 44.288000 |
| C | 2.474000  | 2.303000  | 44.248000 |
| O | 1.690000  | 3.232000  | 44.338000 |
| H | 3.525000  | 4.450000  | 44.521000 |
| H | 5.266000  | 4.007000  | 44.594000 |
| H | 4.496000  | 4.224000  | 43.025000 |
| H | 5.766000  | 1.605000  | 43.909000 |
| H | 5.896000  | -1.008000 | 44.748000 |
| H | 4.578000  | -1.946000 | 44.006000 |
| H | 5.687000  | -1.004000 | 42.980000 |
| H | 1.057000  | 0.887000  | 44.398000 |
| C | 1.239000  | 5.773000  | 47.428000 |
| N | 1.660000  | 4.347000  | 47.478000 |
| C | 2.986000  | 4.005000  | 47.378000 |
| C | 3.374000  | 2.715000  | 47.428000 |
| C | 4.806000  | 2.287000  | 47.318000 |
| C | 2.405000  | 1.657000  | 47.578000 |
| O | 2.676000  | 0.451000  | 47.628000 |
| N | 1.104000  | 2.092000  | 47.668000 |
| C | 0.668000  | 3.401000  | 47.628000 |
| O | -0.512000 | 3.692000  | 47.718000 |
| H | 0.257000  | 5.756000  | 47.901000 |
| H | 1.927000  | 6.420000  | 47.973000 |
| H | 1.176000  | 6.143000  | 46.405000 |
| H | 3.742000  | 4.771000  | 47.289000 |
| H | 5.383000  | 2.734000  | 48.128000 |
| H | 4.867000  | 1.201000  | 47.386000 |
| H | 5.211000  | 2.614000  | 46.360000 |
| H | 0.354000  | 1.423000  | 47.778000 |

C-C (A-DNA)

|   |           |          |           |
|---|-----------|----------|-----------|
| C | 3.134000  | 7.998000 | 0.520000  |
| N | 1.279000  | 3.042000 | 2.100000  |
| C | 1.697000  | 4.244000 | 1.720000  |
| N | 3.017000  | 4.491000 | 1.760000  |
| C | 3.486000  | 5.710000 | 1.370000  |
| O | 4.696000  | 5.989000 | 1.390000  |
| N | 2.589000  | 6.676000 | 0.940000  |
| C | 1.250000  | 6.429000 | 0.900000  |
| C | 0.753000  | 5.226000 | 1.270000  |
| H | 2.332000  | 8.732000 | 0.593000  |
| H | 3.485000  | 7.906000 | -0.508000 |
| H | 3.955000  | 8.252000 | 1.190000  |
| H | 0.274000  | 2.817000 | 2.082000  |
| H | 1.960000  | 2.335000 | 2.412000  |
| H | 0.569000  | 7.212000 | 0.565000  |
| H | -0.315000 | 5.013000 | 1.228000  |
| C | 6.958000  | 5.037000 | -2.040000 |
| N | 2.720000  | 1.869000 | -0.460000 |
| C | 3.721000  | 2.654000 | -0.840000 |
| N | 4.965000  | 2.149000 | -0.800000 |
| C | 6.018000  | 2.922000 | -1.190000 |



|   |          |          |           |
|---|----------|----------|-----------|
| O | 7.187000 | 2.503000 | -1.170000 |
| N | 5.785000 | 4.219000 | -1.620000 |
| C | 4.525000 | 4.735000 | -1.660000 |
| C | 3.457000 | 3.991000 | -1.290000 |
| H | 6.679000 | 6.088000 | -1.967000 |
| H | 7.204000 | 4.770000 | -3.068000 |
| H | 7.786000 | 4.808000 | -1.370000 |
| H | 1.753000 | 2.223000 | -0.478000 |
| H | 2.911000 | 0.906000 | -0.148000 |
| H | 4.375000 | 5.761000 | -1.995000 |
| H | 2.443000 | 4.389000 | -1.332000 |

C-C (B-DNA)

|   |           |           |           |
|---|-----------|-----------|-----------|
| C | -5.841000 | -0.470000 | 23.190000 |
| N | -4.615000 | 0.371000  | 23.240000 |
| C | -4.683000 | 1.723000  | 23.140000 |
| C | -3.563000 | 2.495000  | 23.190000 |
| C | -2.317000 | 1.810000  | 23.340000 |
| N | -1.184000 | 2.493000  | 23.390000 |
| N | -2.260000 | 0.476000  | 23.440000 |
| C | -3.389000 | -0.273000 | 23.390000 |
| O | -3.368000 | -1.507000 | 23.480000 |
| H | -5.519000 | -1.420000 | 23.617000 |
| H | -6.652000 | -0.035000 | 23.774000 |
| H | -6.197000 | -0.602000 | 22.168000 |
| H | -5.644000 | 2.201000  | 23.018000 |
| H | -3.641000 | 3.580000  | 23.122000 |
| H | -0.305000 | 2.007000  | 23.500000 |
| H | -1.198000 | 3.501000  | 23.320000 |
| C | -4.449000 | -3.814000 | 26.570000 |
| N | -3.952000 | -2.412000 | 26.620000 |
| C | -4.801000 | -1.359000 | 26.520000 |
| C | -4.349000 | -0.076000 | 26.570000 |
| C | -2.938000 | 0.103000  | 26.720000 |
| N | -2.423000 | 1.321000  | 26.770000 |
| N | -2.109000 | -0.943000 | 26.820000 |
| C | -2.582000 | -2.213000 | 26.770000 |
| O | -1.839000 | -3.199000 | 26.860000 |
| H | -3.630000 | -4.393000 | 26.997000 |
| H | -5.361000 | -3.939000 | 27.154000 |
| H | -4.659000 | -4.130000 | 25.548000 |
| H | -5.859000 | -1.537000 | 26.398000 |
| H | -5.051000 | 0.755000  | 26.503000 |
| H | -1.427000 | 1.444000  | 26.880000 |
| H | -3.027000 | 2.128000  | 26.700000 |
